# Supplementary material for: CO 2 drawdown due to particle ballasting by glacial aeolian dust: an estimate based on the ocean carbon cycle model MPIOM/HAMOCC version 1.6.2p3
Source: Copernicus journal article supplement (doi:10.5194/gmd-12-1869-2019), 2019-05-10
Supplement: Supplementary file 1 [file gmd-12-1869-2019-supplement.zip]

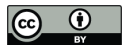

## *Supplement of*

# **CO<sub>2</sub> drawdown due to particle ballasting by glacial aeolian dust: an estimate based on the ocean carbon cycle model MPIOM/HAMOCC version 1.6.2p3**

**Malte Heinemann et al.**

*Correspondence to:* Malte Heinemann ([malte.heinemann@ifg.uni-kiel.de](mailto:malte.heinemann@ifg.uni-kiel.de))

- [gmd-12-1869-2019-supplement-title-page.pdf](#)
- [gmd-2018-137-supplement-version4](#)
  - [.\\_HOWTO\\_change\\_runscript.job](#)
  - [.\\_HOWTO\\_change\\_src.f90](#)
  - [.\\_changed\\_src](#)
  - [HOWTO\\_change\\_runscript.job](#)
  - [HOWTO\\_change\\_src.f90](#)
  - [changed\\_src](#)
    - \* [.\\_mo\\_beleg\\_bgc.f90](#)
    - \* [.\\_mo\\_bgc\\_varlist.f90](#)
    - \* [.\\_mo\\_carbch.f90](#)
    - \* [.\\_ocprod.f90](#)
    - \* [mo\\_beleg\\_bgc.f90](#)
    - \* [mo\\_bgc\\_varlist.f90](#)
    - \* [mo\\_carbch.f90](#)
    - \* [ocprod.f90](#)

The copyright of individual parts of the supplement might differ from the CC BY 4.0 License.
